# Supplementary material
Source: PubMed Central journal article supplement (PMC6024637)
Supplement: blood828996-suppl1.pdf [file blood828996-suppl1.pdf]

## Supplementary Material

**Title:** Impact of Gut Colonization with Butyrate Producing Microbiota on Respiratory Viral Infection Following Allo-HCT

**Running title:** Butyrate-producing bacteria in allo-HCT

**Authors:** Bastiaan W. Haak, MD<sup>1,4</sup>, Eric R. Littmann, BA<sup>1,3</sup>, Jean-Luc Chaubard, PhD<sup>5</sup>, Amanda J. Pickard, PhD<sup>5</sup>, Emily Fontana, BA<sup>3</sup>, Fatima Adhi<sup>7</sup>, MD, Yangtsho Gyaltsen, BA<sup>3</sup>, Lilian Ling, MA<sup>3</sup>, Sejal M. Morjaria, MD<sup>1,3,8</sup>, Jonathan U. Peled, MD<sup>2,8</sup>, Marcel R. van den Brink, MD, PhD<sup>2,8</sup>, Alexander I. Geyer, MD<sup>6,8</sup>, Justin R. Cross, PhD<sup>5</sup>, Eric G. Pamer, MD<sup>1,3,8</sup>, Ying Taur, MD, MPH<sup>1,3,8</sup>

<sup>1</sup>Infectious Disease Service, Department of Medicine, Memorial Sloan-Kettering Cancer Center, New York, NY, USA <sup>2</sup>Adult Bone Marrow Transplant Service, Department of Medicine, Memorial Sloan-Kettering Cancer Center, New York, NY, USA <sup>3</sup>Center for Microbes, Inflammation and Cancer, Memorial Sloan Kettering Cancer Center, New York, NY, USA <sup>4</sup>Center for Experimental and Molecular Medicine, Academic Medical Center, University of Amsterdam, Amsterdam, The Netherlands. <sup>5</sup>Donald B. and Catherine C. Marron Cancer Metabolism Center, Sloan Kettering Institute, New York, New York, USA <sup>6</sup>Pulmonary Service, Department of Medicine, Memorial Sloan Kettering Cancer Center, New York, NY, USA <sup>7</sup>Infectious Diseases Service, New York University School of Medicine, New York, NY, USA <sup>8</sup>Weill Cornell Medical College, New York, NY USA

### Defining lower respiratory tract infection (LRTI)

There is no formal validated approach to defining combined clinical and radiographic endpoints for lung injury in these complex HCT patients.<sup>1</sup> Presenting signs, symptoms and radiographic findings associated with pulmonary processes are highly variable, due in large part to heterogeneous inflammatory responses during pre- and peri-engraftment periods, as well as a of myriad comorbidities. For this study, the primary endpoint, LRTI, was employed as a broad clinical-radiographic definition. It required a clinical indication for chest imaging (respiratory symptoms, e.g. cough, dyspnea, and/or abnormal vital signs, e.g. fever, hypoxia) and the development of a radiographic parenchymal abnormality that correlated clinically with an infection and influenced management. The operational procedure involved independent chart review by two study physicians (B.W. Haak and F. Adhi) on each of the 360 included study subjects. First, this entailed manual extraction of all respiratory viral infections in the first 180 days following allogeneic hematopoietic stem cell transplant (allo-HSCT). Next, of the patients who were identified with a respiratory viral infection, all diagnostic chest images seven days prior to and 14 days following respiratory virus infection were reviewed, as described by the clinical radiologist in the electronic medical record (EMR). When a study subject was identified as having any new parenchymal abnormality on Computed Tomography (CT) scan or x-ray, information regarding indication for imaging, radiographic patterns, subsequent diagnostic work-up, and therapeutic management were reviewed. Abnormal parenchymal findings were only

deemed to be a LRTI if the transplant physician caring for the patient deemed an infection was present, and elicited a treatment plan based on these findings and the clinical picture. Specific diagnoses were assigned to LRTI events only if supportive diagnostic results corroborated with the transplant provider's clinical impression, as documented in the EMR. Abnormal parenchymal findings thought to be caused by volume overload or cardiogenic pulmonary edema (as defined by radiographic appearance, supportive echocardiogram and/or BNP data, and stated as such in the EMR) were excluded when considered isolated explanations for the presenting respiratory signs or symptoms. An impression of atelectasis by the clinical radiologist was also excluded if considered incidental (e.g. fever work-up but no respiratory complaints, with subsequent identification of an extra-pulmonary fever source); however, an infiltrate initially identified as atelectasis in a patient with hypoxia that clearly evolved into pneumonia on repeat imaging was considered a LRTI. A pulmonary specialist (A.I. Geyer) adjudicated a detailed review of the clinical data and provider notes surrounding each event.

### **Selection criteria of bacteria with known butyrate-producing properties**

To verify the findings that bacteria with butyrate-producing properties were associated with protection against LRTI progression following URTI, we selected a group of bacteria with known butyrate-producing properties, adapted from a study that analyzed butyrate-producing pathways in 3,184 sequenced bacterial genomes, and 15 healthy volunteers.<sup>2</sup> This recent study identified a total of 225 bacteria with butyrate-producing properties, of which 61 bacterial species were isolated out of human samples. 44 out of these 61 bacterial species were detected in this cohort (table S3).

### **REFERENCES**

1. Harris B, Morjaria SM, Littmann ER, et al. Gut Microbiota Predict Pulmonary Infiltrates after Allogeneic Hematopoietic Cell Transplantation. *Am J Respir Crit Care Med.* 2016;194(4):450–63
2. Vital M, Howe AC, Tiedje JM. Revealing the Bacterial Butyrate Synthesis Pathways by Analyzing (Meta)genomic Data. *MBio.*2014; 5(2):e00889.

**Table S1. List of bacterial taxa with known butyrate-producing properties that were selected for analysis**

| Superkingdom | Phylum         | Class            | Order               | Family                | Genus/Species                  | # samples containing 16S sequences |
|--------------|----------------|------------------|---------------------|-----------------------|--------------------------------|------------------------------------|
| Bacteria     | Actinobacteria | Actinobacteria   | Propionibacteriales | Propionibacteriaceae  | Propionibacterium acidifaciens | 39 (10.8%)                         |
| Bacteria     | Bacteroidetes  | Bacteroidia      | Bacteroidales       | Porphyromonadaceae    | Odoribacter splanchnicus       | 0 (0.0%)                           |
| Bacteria     | Bacteroidetes  | Bacteroidia      | Bacteroidales       | Porphyromonadaceae    | Porphyromonas asaccharolytica  | 2 (0.6%)                           |
| Bacteria     | Bacteroidetes  | Bacteroidia      | Bacteroidales       | Porphyromonadaceae    | Porphyromonas endodontalis     | 4 (1.1%)                           |
| Bacteria     | Bacteroidetes  | Bacteroidia      | Bacteroidales       | Porphyromonadaceae    | Porphyromonas gingivalis       | 3 (0.8%)                           |
| Bacteria     | Bacteroidetes  | Bacteroidia      | Bacteroidales       | Porphyromonadaceae    | Porphyromonas stercorihominis  | 0 (0.0%)                           |
| Bacteria     | Bacteroidetes  | Bacteroidia      | Bacteroidales       | Rikenellaceae         | Alistipes putredinis           | 42 (11.7%)                         |
| Bacteria     | Firmicutes     | Clostridia       | Clostridiales       | Clostridiaceae        | Clostridium botulinum          | 0 (0.0%)                           |
| Bacteria     | Firmicutes     | Clostridia       | Clostridiales       | Clostridiaceae        | Clostridium butyricum          | 15 (4.2%)                          |
| Bacteria     | Firmicutes     | Clostridia       | Clostridiales       | Clostridiaceae        | Clostridium perfringens        | 18 (5.0%)                          |
| Bacteria     | Firmicutes     | Clostridia       | Clostridiales       | Clostridiaceae        | Clostridium sporogenes         | 11 (3.1%)                          |
| Bacteria     | Firmicutes     | Clostridia       | Clostridiales       | Eubacteriaceae        | Anaerofustis stercorihominis   | 29 (8.1%)                          |
| Bacteria     | Firmicutes     | Clostridia       | Clostridiales       | Eubacteriaceae        | Eubacterium cellulosolvens     | 2 (0.6%)                           |
| Bacteria     | Firmicutes     | Clostridia       | Clostridiales       | Eubacteriaceae        | Eubacterium desmolans          | 47 (13.1%)                         |
| Bacteria     | Firmicutes     | Clostridia       | Clostridiales       | Eubacteriaceae        | Eubacterium hallii             | 41 (11.4%)                         |
| Bacteria     | Firmicutes     | Clostridia       | Clostridiales       | Eubacteriaceae        | Eubacterium limosum            | 36 (10.0%)                         |
| Bacteria     | Firmicutes     | Clostridia       | Clostridiales       | Eubacteriaceae        | Eubacterium rectale            | 57 (15.8%)                         |
| Bacteria     | Firmicutes     | Clostridia       | Clostridiales       | Eubacteriaceae        | Eubacterium saphenum           | 4 (1.1%)                           |
| Bacteria     | Firmicutes     | Clostridia       | Clostridiales       | Eubacteriaceae        | Eubacterium ventriosum         | 14 (3.9%)                          |
| Bacteria     | Firmicutes     | Clostridia       | Clostridiales       | Eubacteriaceae        | Pseudoramibacter alactolyticus | 26 (7.2%)                          |
| Bacteria     | Firmicutes     | Clostridia       | Clostridiales       | Lachnospiraceae       | Anaerostipes caccae            | 55 (15.3%)                         |
| Bacteria     | Firmicutes     | Clostridia       | Clostridiales       | Lachnospiraceae       | Butyrivibrio crossotus         | 13 (3.6%)                          |
| Bacteria     | Firmicutes     | Clostridia       | Clostridiales       | Lachnospiraceae       | Butyrivibrio fibrisolvens      | 0 (0.0%)                           |
| Bacteria     | Firmicutes     | Clostridia       | Clostridiales       | Lachnospiraceae       | Butyrivibrio proteoclasticus   | 0 (0.0%)                           |
| Bacteria     | Firmicutes     | Clostridia       | Clostridiales       | Lachnospiraceae       | Clostridium saccharolyticum    | 19 (5.3%)                          |
| Bacteria     | Firmicutes     | Clostridia       | Clostridiales       | Lachnospiraceae       | Clostridium symbiosum          | 48 (13.3%)                         |
| Bacteria     | Firmicutes     | Clostridia       | Clostridiales       | Lachnospiraceae       | Coprococcus catus              | 35 (9.7%)                          |
| Bacteria     | Firmicutes     | Clostridia       | Clostridiales       | Lachnospiraceae       | Coprococcus comes              | 62 (17.2%)                         |
| Bacteria     | Firmicutes     | Clostridia       | Clostridiales       | Lachnospiraceae       | Coprococcus eutactus           | 13 (3.6%)                          |
| Bacteria     | Firmicutes     | Clostridia       | Clostridiales       | Lachnospiraceae       | Lachnoanaerobaculum saburreum  | 0 (0.0%)                           |
| Bacteria     | Firmicutes     | Clostridia       | Clostridiales       | Lachnospiraceae       | Roseburia hominis              | 13 (3.6%)                          |
| Bacteria     | Firmicutes     | Clostridia       | Clostridiales       | Lachnospiraceae       | Roseburia intestinalis         | 24 (6.7%)                          |
| Bacteria     | Firmicutes     | Clostridia       | Clostridiales       | Lachnospiraceae       | Roseburia inulinivorans        | 20 (5.6%)                          |
| Bacteria     | Firmicutes     | Clostridia       | Clostridiales       | Lachnospiraceae       | Shuttleworthia satelles        | 57 (15.8%)                         |
| Bacteria     | Firmicutes     | Clostridia       | Clostridiales       | Peptoniphilaceae      | Anaerococcus hydrogenalis      | 0 (0.0%)                           |
| Bacteria     | Firmicutes     | Clostridia       | Clostridiales       | Peptoniphilaceae      | Anaerococcus lactolyticus      | 0 (0.0%)                           |
| Bacteria     | Firmicutes     | Clostridia       | Clostridiales       | Peptoniphilaceae      | Anaerococcus prevotii          | 10 (2.8%)                          |
| Bacteria     | Firmicutes     | Clostridia       | Clostridiales       | Peptoniphilaceae      | Anaerococcus tetradius         | 0 (0.0%)                           |
| Bacteria     | Firmicutes     | Clostridia       | Clostridiales       | Peptoniphilaceae      | Anaerococcus vaginalis         | 20 (5.6%)                          |
| Bacteria     | Firmicutes     | Clostridia       | Clostridiales       | Peptoniphilaceae      | Peptoniphilus duerdenii        | 1 (0.3%)                           |
| Bacteria     | Firmicutes     | Clostridia       | Clostridiales       | Peptoniphilaceae      | Peptoniphilus harei            | 0 (0.0%)                           |
| Bacteria     | Firmicutes     | Clostridia       | Clostridiales       | Peptoniphilaceae      | Peptoniphilus lacrimalis       | 7 (1.9%)                           |
| Bacteria     | Firmicutes     | Clostridia       | Clostridiales       | Peptostreptococcaceae | Eubacterium yurii              | 1 (0.3%)                           |
| Bacteria     | Firmicutes     | Clostridia       | Clostridiales       | Peptostreptococcaceae | Peptoclostridium difficile     | 52 (14.4%)                         |
| Bacteria     | Firmicutes     | Clostridia       | Clostridiales       | Ruminococcaceae       | Anaerotruncus colihominis      | 44 (12.2%)                         |
| Bacteria     | Firmicutes     | Clostridia       | Clostridiales       | Ruminococcaceae       | Faecalibacterium prausnitzii   | 61 (16.9%)                         |
| Bacteria     | Firmicutes     | Clostridia       | Clostridiales       | Ruminococcaceae       | Subdoligranulum variabile      | 96 (26.7%)                         |
| Bacteria     | Firmicutes     | Erysipelotrichia | Erysipelotrichales  | Erysipelotrichaceae   | Eubacterium dolichum           | 54 (15.0%)                         |
| Bacteria     | Firmicutes     | Erysipelotrichia | Erysipelotrichales  | Erysipelotrichaceae   | Holdemanella biformis          | 40 (11.1%)                         |
| Bacteria     | Firmicutes     | Negativicutes    | Selenomonadales     | Acidaminococcaceae    | Acidaminococcus fermentans     | 0 (0.0%)                           |
| Bacteria     | Firmicutes     | Negativicutes    | Selenomonadales     | Veillonellaceae       | Acetonema longum               | 1 (0.3%)                           |
| Bacteria     | Firmicutes     | Negativicutes    | Selenomonadales     | Veillonellaceae       | Megasphaera micronuciformis    | 72 (20.0%)                         |
| Bacteria     | Fusobacteria   | Fusobacteriia    | Fusobacteriales     | Fusobacteriaceae      | Fusobacterium gonidiaformans   | 0 (0.0%)                           |
| Bacteria     | Fusobacteria   | Fusobacteriia    | Fusobacteriales     | Fusobacteriaceae      | Fusobacterium mortiferum       | 4 (1.1%)                           |
| Bacteria     | Fusobacteria   | Fusobacteriia    | Fusobacteriales     | Fusobacteriaceae      | Fusobacterium nucleatum        | 54 (15.0%)                         |
| Bacteria     | Fusobacteria   | Fusobacteriia    | Fusobacteriales     | Fusobacteriaceae      | Fusobacterium ulcerans         | 0 (0.0%)                           |
| Bacteria     | Fusobacteria   | Fusobacteriia    | Fusobacteriales     | Fusobacteriaceae      | Fusobacterium varium           | 16 (4.4%)                          |
| Bacteria     | Spirochaetes   | Spirochaetia     | Brachyspirales      | Brachyspiraceae       | Brachyspira murdochii          | 0 (0.0%)                           |
| Bacteria     | Spirochaetes   | Spirochaetia     | Brachyspirales      | Brachyspiraceae       | Brachyspira pilosicoli         | 0 (0.0%)                           |
| Bacteria     | Spirochaetes   | Spirochaetia     | Spirochaetales      | Spirochaetaceae       | Treponema phagedenis           | 0 (0.0%)                           |
| Bacteria     | Spirochaetes   | Spirochaetia     | Spirochaetales      | Spirochaetaceae       | Treponema vincentii            | 0 (0.0%)                           |

Total 61 Species, 44 detected in data

**Table S2: Case Mix of Allo-HCT recipients not included in the study cohort**

| Variable                      | Value                    | Patients not in cohort | Study cohort | Fisher P-value |
|-------------------------------|--------------------------|------------------------|--------------|----------------|
| <b>Age (years)</b>            | ≤29                      | 35 (6.3%)              | 26 (7.2%)    | 0.741          |
|                               | 30-39                    | 60 (10.8%)             | 48 (13.3%)   |                |
|                               | 40-49                    | 88 (15.9%)             | 53 (14.7%)   |                |
|                               | 50-59                    | 163 (29.5%)            | 107 (29.7%)  |                |
|                               | ≥60                      | 207 (37.4%)            | 126 (35.0%)  |                |
| <b>Sex</b>                    | Female                   | 224 (40.5%)            | 131 (36.4%)  | 0.238          |
|                               | Male                     | 329 (59.5%)            | 229 (63.6%)  |                |
| <b>Underlying disease</b>     | Leukemia                 | 284 (51.4%)            | 187 (51.9%)  | 0.766          |
|                               | Lymphoma                 | 105 (19.0%)            | 66 (18.3%)   |                |
|                               | Multiple Myeloma         | 47 (8.5%)              | 36 (10.0%)   |                |
|                               | Myelodysplastic Syndrome | 88 (15.9%)             | 58 (16.1%)   |                |
|                               | Other Disorders          | 29 (5.2%)              | 13 (3.6%)    |                |
| <b>Conditioning Intensity</b> | Myeloablative            | 259 (46.8%)            | 174 (48.3%)  | 0.760          |
|                               | Reduced Intensity        | 245 (44.3%)            | 159 (44.2%)  |                |
|                               | Nonmyeloablative         | 49 (8.9%)              | 27 (7.5%)    |                |
| <b>Stem cell source</b>       | Related Identical        | 81 (14.6%)             | 74 (20.6%)   | 0.077          |
|                               | Unrelated Identical      | 76 (13.7%)             | 52 (14.4%)   |                |
|                               | Non-Identical            | 147 (26.6%)            | 96 (26.7%)   |                |
|                               | Umbilical Cord           | 249 (45.0%)            | 138 (38.3%)  |                |
| <b>Time to engraftment</b>    | <14 days                 | 393 (71.1%)            | 270 (75.0%)  | 0.198          |
|                               | ≥14 days                 | 160 (28.9%)            | 90 (25.0%)   |                |
| <b>Corticosteroid use</b>     | No                       | 265 (47.9%)            | 168 (46.7%)  | 0.735          |
|                               | Yes                      | 288 (52.1%)            | 192 (53.3%)  |                |
| <b>Beta.Lactam</b>            | No                       | 131 (23.7%)            | 71 (19.7%)   | 0.166          |
|                               | Yes                      | 422 (76.3%)            | 289 (80.3%)  |                |
| <b>Fluoroquinolones</b>       | No                       | 101 (18.3%)            | 62 (17.2%)   | 0.724          |
|                               | Yes                      | 452 (81.7%)            | 298 (82.8%)  |                |
| <b>Vancomycin (IV)</b>        | No                       | 30 (5.4%)              | 11 (3.1%)    | 0.103          |
|                               | Yes                      | 523 (94.6%)            | 349 (96.9%)  |                |
| <b>Metronidazole</b>          | No                       | 464 (83.9%)            | 300 (83.3%)  | 0.855          |
|                               | Yes                      | 89 (16.1%)             | 60 (16.7%)   |                |
| <b>Total</b>                  |                          | 553 (100%)             | 360 (100%)   | -              |

IV: intravenous

**Table S3. Characteristics of Diagnosed Viral Lower Respiratory Tract Infections (47 cases)**

| Viral LRTI pathogen         | Time (post-HCT) | Diagnostic Specimen Type | Butyrate Abundance Group | Butyrate Abundance (16S) | Butyrate (mM) |
|-----------------------------|-----------------|--------------------------|--------------------------|--------------------------|---------------|
| FluB                        | 125             | NP,BAL                   | Low                      | 0.00068                  | not performed |
| Adeno                       | 20              | NP,BW,BAL                | Absent                   | 0                        | 0.025         |
| Adeno                       | 160             | BAL                      | Low                      | 0.00027                  | <0.010        |
| Corona(NL63)                | 140             | NP,BAL,BW                | Absent                   | 0                        | <0.010        |
| Adeno                       | 23              | NP,BAL,BW                | Absent                   | 0.000057                 | <0.010        |
| Rhino                       | 159             | NP,BAL                   | Low                      | 0.00063                  | 3.7           |
| Rhino                       | 34              | NP,BAL                   | Absent                   | 0                        | <0.010        |
| RSV                         | 66              | NP,BAL                   | Absent                   | 0                        | 0.031         |
| Metapneumo                  | 30              | NP,BW,BAL                | Low                      | 0.00048                  | <0.010        |
| Paraflu3                    | 160             | NP,BW                    | Low                      | 0.00015                  | <0.010        |
| Corona(OC43)                | 156             | NP,sputum,BW             | Absent                   | 0                        | 1.6           |
| Rhino                       | 92              | NP,sputum                | Low                      | 0.0013                   | 0.1           |
| Rhino                       | 134             | NP                       | Absent                   | 0                        | 0.026         |
| Corona(229E),FluA,RSV       | 152             | NP                       | Absent                   | 0                        | 0.033         |
| Corona(NL63)                | 56              | NP                       | Low                      | 0.00033                  | 0.4           |
| Rhino                       | 144             | NP                       | Absent                   | 0.0000074                | <0.010        |
| Rhino                       | 117             | NP                       | Absent                   | 0                        | <0.010        |
| Rhino                       | 40              | NP                       | Absent                   | 0                        | 0.09          |
| Rhino                       | 93              | NP                       | Absent                   | 0                        | <0.010        |
| Rhino                       | 123             | NP                       | Low                      | 0.00021                  | 0.23          |
| Corona(HKU1)                | 52              | NP                       | Absent                   | 0                        | <0.010        |
| Metapneumo                  | 138             | NP                       | Low                      | 0.0024                   | <0.010        |
| Rhino                       | 95              | NP                       | Low                      | 0.00078                  | <0.010        |
| Paraflu1                    | 34              | NP                       | Absent                   | 0                        | <0.010        |
| Paraflu3                    | 130             | NP                       | Low                      | 0.00033                  | <0.010        |
| Rhino                       | 167             | NP                       | Low                      | 0.00016                  | 0.04          |
| Rhino                       | 80              | NP                       | Low                      | 0.0018                   | <0.010        |
| Rhino                       | 67              | NP                       | Low                      | 0.00073                  | <0.010        |
| Adeno,Metapneumo,Rhino      | 151             | NP                       | High                     | 0.099                    | 0.15          |
| Rhino                       | 123             | NP                       | Absent                   | 0                        | 2.6           |
| Metapneumo                  | 90              | NP                       | Low                      | 0.0011                   | <0.010        |
| Corona(OC43)                | 17              | NP                       | Absent                   | 0                        | <0.010        |
| Rhino                       | 89              | NP                       | Absent                   | 0                        | 0.025         |
| Corona(OC43),RSV            | 55              | NP                       | Absent                   | 0                        | 0.32          |
| RSV                         | 75              | NP                       | Absent                   | 0                        | 0.03          |
| Rhino                       | 62              | NP                       | Absent                   | 0                        | 0.92          |
| Corona(NL63)                | 96              | NP                       | Absent                   | 0                        | 0.028         |
| Corona(OC43),Rhino          | 104             | NP                       | Low                      | 0.002                    | <0.010        |
| RSV                         | 61              | NP                       | Low                      | 0.00085                  | <0.010        |
| Paraflu4,RSV                | 136             | NP                       | Absent                   | 0                        | 0.35          |
| Rhino                       | 17              | NP                       | Low                      | 0.00057                  | 0.031         |
| Corona(OC43)                | 37              | NP                       | Absent                   | 0.000034                 | <0.010        |
| Metapneumo                  | 81              | NP                       | Low                      | 0.00054                  | <0.010        |
| Rhino                       | 110             | NP                       | Low                      | 0.002                    | <0.010        |
| RSV                         | 94              | NP                       | Low                      | 0.0024                   | <0.010        |
| Corona(229E),Metapneumo,RSV | 160             | NP                       | High                     | 0.048                    | <0.010        |
| RSV                         | 136             | NP                       | Low                      | 0.0056                   | <0.010        |

NP: nasopharynx swab; BAL: bronchoalveolar lavage; BW: bronchial wash; Sputum: induced sputum; Adeno: Adenovirus; Rhino: Rhinovirus; Corona: Coronavirus; RSV: Respiratory Syncytial Virus; Flu: Influenza; Paraflu: Parainfluenza; Metapneumo: Human Metapneumovirus

**Table S4: Analysis of alternative microbiota predictors of viral LRTI**

| <b>Microbiota variable</b>                 | <b>Hazard ratio</b> | <b>P-value</b> |
|--------------------------------------------|---------------------|----------------|
| Lachnospiraceae abundance ( $\geq 0.001$ ) | 0.97 (0.55 - 1.72)  | 0.930          |
| Ruminococcaceae abundance ( $\geq 0.001$ ) | 0.79 (0.40 - 1.47)  | 0.475          |
| Bacteroidetes abundance ( $\geq 0.001$ )   | 0.91 (0.50 - 1.61)  | 0.749          |
| Microbial diversity (<2)                   | 1.00                | –              |
| Microbial diversity (2-4)                  | 1.25 (0.66 - 2.31)  | 0.481          |
| Microbial diversity (>4)                   | 0.58 (0.23 - 1.30)  | 0.198          |
